## RESEARCH ARTICLE

# Cost-effectiveness analysis of carbetocin for prevention of postpartum hemorrhage in a low-burden high-resource city of China

Joyce H. S. You<sup>1\*</sup>, Tak-yeung Leung<sup>2</sup>

**1** School of Pharmacy, Faculty of Medicine, The Chinese University of Hong Kong, Hong Kong SAR, China, **2** Department of Obstetrics and Gynaecology, Faculty of Medicine, The Chinese University of Hong Kong, Hong Kong SAR, China

\* [joyceyou@cuhk.edu.hk](mailto:joyceyou@cuhk.edu.hk)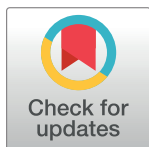

## Abstract

### OPEN ACCESS

**Citation:** You JHS, Leung T-y (2022) Cost-effectiveness analysis of carbetocin for prevention of postpartum hemorrhage in a low-burden high-resource city of China. PLoS ONE 17(12): e0279130. <https://doi.org/10.1371/journal.pone.0279130>

**Editor:** Matteo Ruggeri, Istituto Superiore di Sanità and St. Camillus International University of Health Sciences, ITALY

**Received:** September 14, 2022

**Accepted:** December 1, 2022

**Published:** December 15, 2022

**Copyright:** © 2022 You, Leung. This is an open access article distributed under the terms of the [Creative Commons Attribution License](https://creativecommons.org/licenses/by/4.0/), which permits unrestricted use, distribution, and reproduction in any medium, provided the original author and source are credited.

**Data Availability Statement:** All relevant data are within the paper.

**Funding:** This project is funded by the Ferring Pharmaceuticals Limited (<https://www.ferring.com.hk/en/home/>), and the funding is received by JHSY. The funder had no role in study design, data collection and analysis, decision to publish, or preparation of the manuscript.

**Competing interests:** The authors have declared that no competing interests exist.

## Background

Postpartum hemorrhage (PPH) is a major cause of maternal morbidity, and oxytocin is the first-line uterotonic agent for PPH prevention. Clinical findings have reported carbetocin to reduce PPH risk without increasing risk of important side effects. Hong Kong is a low PPH burden and high-resource city in China. We aimed to examine the cost-effectiveness of PPH prevention with carbetocin from the perspective of Hong Kong public healthcare provider.

## Methods

A decision-analytic model was developed to simulate clinical and economic outcomes of carbetocin and oxytocin for PPH prevention in a hypothetical cohort of women at the third stage of labor following vaginal birth or Caesarean section (C-section). The model inputs were retrieved from literature and public data. Base-case analysis and sensitivity analysis were performed. The model time horizon was the postpartum hospitalization period. Primary model outcomes included PPH-related direct medical cost, PPH, hysterectomy, maternal death, and quality-adjusted life-year (QALY) loss.

## Results

In base-case analysis, carbetocin (versus oxytocin) reduced PPH-related cost (by USD29 per birth), PPH  $\geq 500$  mL and  $\geq 1,500$  mL (by 13.7 and 1.9 per 1,000 births), hysterectomy (by 0.15 per 1,000 births), maternal death (by 0.02 per 1,000 births), and saved 0.00059 QALY per birth. Relative risk of PPH  $\geq 500$  mL with carbetocin versus oxytocin, and proportion of child births by C-section were two influential parameters identified in deterministic sensitivity analysis. In probabilistic sensitivity analysis, carbetocin was accepted as cost-effective in >99.7% of the 10,000 Monte Carlo simulations at a willingness-to-pay threshold of zero USD/QALY.

## Conclusion

PPH prevention with carbetocin appeared to reduce major unfavorable outcomes, and save cost and QALYs.

## Introduction

Postpartum hemorrhage (PPH) is a major cause of maternal morbidity including serious events such as coagulopathy, acute respiratory failure, and renal failure associated with hypovolemic shock and resuscitation [1, 2]. PPH is frequently defined as blood loss of  $\geq 500$  mL from the genital tract within 24 hours of childbirth [3]. The prevalence of PPH has been more prominent in the developing regions, yet it is rising and ranges 3%-8% in the developed countries [3–5]. In Hong Kong, a high-resource city of China, the PPH prevalence was reported to increase from 4.8% to 6.2% over 2013–2017. Despite the relative low prevalence of PPH, the disease burden associated with PPH-related management is high in Hong Kong, including first-line uterotonic drug treatment, second-line therapies (balloon tamponade, compression sutures, and artery embolisation or surgical ligation), and hysterectomy [6].

The use of uterotonic agent is the recommended prophylaxis for prevention of PPH, and oxytocin is the first-line uterotonic agent [3]. Carbetocin is a synthetic analogue of oxytocin, with enhanced half-life, duration and stability [7]. A recent meta-analysis of 196 clinical trials ( $n = 135,559$ ) reported by the Cochrane Review had showed that the use of carbetocin was associated with reduced risk of PPH  $\leq 500$  mL (RR 0.72 (95% CI 0.56 to 0.93)) when compared to oxytocin, without increasing the risk of important side effects (such as vomiting and fever) [8]. Findings of prior studies have suggested carbetocin to reduce total direct medical cost and PPH events, and gained higher quality-adjusted life-years (QALYs) (comparing to oxytocin) in the UK [9–11]. The Hospital Authority is the sole public healthcare provider in Hong Kong, and manages 43 public hospitals/institutes and over 120 outpatient clinics. Obstetrics inpatient service is provided by eight of the 43 public hospitals/institutes, each with bed number ranges 1,100–1,900 [12]. Despite the reduced risk of PPH associated with carbetocin, the cost of carbetocin (USD25.6 per single dose 100mcg; USD1 = HKD7.8) is much higher than the drug cost of oxytocin (USD1.03 per 10 IU; dose range 10–40 IU) in the Hospital Authority of Hong Kong [6]. To inform clinicians and healthcare administrators on decision-making of public resource allocation, the present study aimed to examine the cost-effectiveness of carbetocin for the prevention of PPH from the perspective of Hong Kong public healthcare provider.

## Methods

### Model structure

A decision-analytic model (Fig 1) was developed to simulate the clinical and economic outcomes of two uterotonic agents (carbetocin and oxytocin) for PPH prevention in a hypothetical cohort of women at the third stage of labor following vaginal birth or Caesarean section (C-section). Decision tree is a form of decision-analytical model in which hypothetical patients proceed through health states over time based on probability inputs of the model. The model time horizon was the postpartum hospitalization period. Primary model outcomes included PPH-related direct medical cost, PPH, emergency hysterectomy, death, and QALY loss.

At the entry of model, a hypothetical patient (delivered child by vaginal birth or C-section) received PPH prevention with oxytocin 10 IU (intravenous bolus) or carbetocin 100 mcg

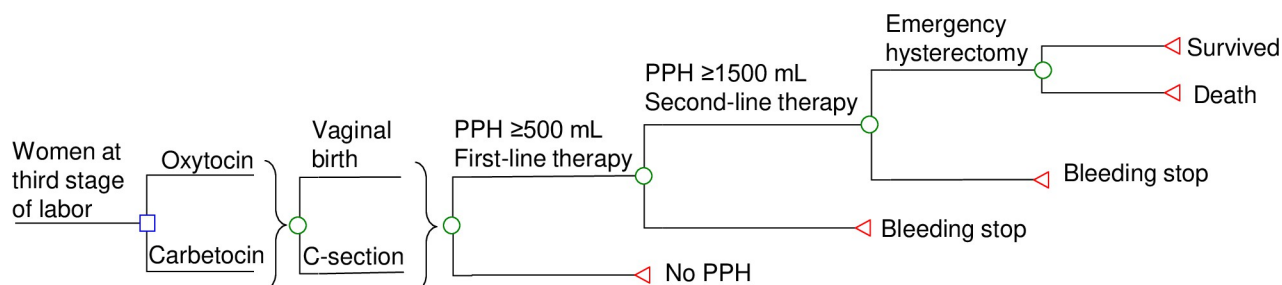

**Fig 1. Simplified decision-analytical model for PPH prevention with carbetocin versus oxytocin.** PPH: Postpartum hemorrhage.

<https://doi.org/10.1371/journal.pone.0279130.g001>

(intravenous infusion). In both study groups, the hypothetical patient might experience postpartum blood loss  $\geq 500$  mL. If blood loss was  $\geq 500$  mL, first-line treatment would be initiated with uterotonic agents (oxytocin-ergometrine infusion, carboprost), and stepped up (when bleeding continued to  $\geq 1,500$  mL) to second-line therapies (balloon tamponade, compression sutures of uterine, and artery embolisation or surgical ligation) and emergency hysterectomy [13].

## Clinical inputs

The parameters used in the present model are shown in Table 1. A literature search on Medline over the period 2000–2022 was performed using keywords such as “postpartum haemorrhage prevention”, “vaginal birth”, “Caesarean section”, “carbetocin”, “oxytocin”, and “postpartum haemorrhage treatment”. The selection criteria for clinical studies were: (1) Written in English language; (2) vaginal or C-section delivery; and (3) PPH prevention/treatment outcomes were reported. A study was included if the data relevant to the model inputs were available. When multiple reports were available for a model input, the weighted average was adopted as the base-case value and the high/ low values as the range for sensitivity analysis.

The proportion of C-section among all child births in the public healthcare sector of Hong Kong (30.4%) adopted the obstetric report of Hospital Authority, under which there were totally eight public obstetric inpatient units serving about 40,000 births per year [14]. The probabilities of PPH  $\geq 500$  mL with oxytocin (as PPH prevention intervention) in vaginal birth (0.022) and C-section (0.110) were approximated using (1) the weighted average of PPH  $\geq 500$  mL per delivery in the Hong Kong public hospitals between 2013–2016 [6] (prior to the introduction of carbetocin in public hospitals [15]), and (2) the relative risk of PPH  $\geq 500$  mL of C-section versus vaginal birth derived from the corresponding absolute effect reported by a network meta-analysis of uterotonic agents for PPH prevention (196 clinical trials ( $n = 135,559$ ) performed in 53 countries) [8]. The probabilities of PPH  $\geq 500$  mL with carbetocin (as PPH prevention intervention) at vaginal birth and C-section were estimated using the corresponding probability of PPH  $\geq 500$  mL with oxytocin and the relative risk of PPH  $\geq 500$  mL with carbetocin (0.72) versus oxytocin [8]. The proportion of cases with blood loss  $\geq 1,500$  mL among PPH cases of  $\geq 500$  mL in vaginal birth (0.1234) and C-section (0.1513) were estimated from the occurrence of PPH  $\geq 1,500$  mL in Hong Kong public hospitals [6] and an outcome analysis of massive primary PPH in Hong Kong [16]. The occurrence of emergency hysterectomy among PPH cases  $\geq 1,500$  mL (0.079) were obtained from the statistics of emergency hysterectomy and massive PPH in Hong Kong public hospitals [6]. The mortality of hysterectomy for severe PPH were approximated using the national registry findings on hysterectomy and maternal mortality of patients with severe PPH in Japan [17].

Table 1. Model input parameters.

| Parameters                                                               | Base case value | Range for sensitivity analysis | Distribution | Reference |
|--------------------------------------------------------------------------|-----------------|--------------------------------|--------------|-----------|
| <b>Clinical inputs</b>                                                   |                 |                                |              |           |
| Proportion of child births by Caesarean section                          | 0.304           | 0.243–0.365                    | Beta         | [14]      |
| Probability of PPH $\geq 500$ mL with oxytocin                           |                 |                                |              |           |
| Vaginal births                                                           | 0.022           | 0.018–0.026                    | Beta         | [6, 8]    |
| Caesarean section                                                        | 0.110           | 0.088–0.132                    | Beta         | [6, 8]    |
| Relative risk of PPH $\geq 500$ mL with carbetocin versus oxytocin       | 0.72            | 0.56–0.93                      | Triangular   | [8]       |
| Proportion of PPH $\geq 1500$ mL among PPH cases $\geq 500$ mL           |                 |                                |              |           |
| Vaginal births                                                           | 0.1234          | 0.0987–0.1481                  | Beta         | [6, 16]   |
| Caesarean section                                                        | 0.1513          | 0.1210–0.1816                  | Beta         | [6, 16]   |
| Proportion of emergency hysterectomy among massive postpartum hemorrhage | 0.079           | 0.063–0.095                    | Beta         | [6]       |
| Mortality rate of emergency hysterectomy                                 | 0.135           | 0–0.162                        | Beta         | [17]      |
| <b>Utility inputs</b>                                                    |                 |                                |              |           |
| Age (years)                                                              | 33              | 18–45                          | Triangular   | [24]      |
| Health utility for females $\geq 18$ years                               | 0.92            | -                              | -            | [22]      |
| Disutility                                                               |                 |                                |              |           |
| PPH-related hospitalization without hysterectomy                         | 0.347           | 0.1–0.7                        | Triangular   | [18]      |
| PPH-related hospitalization with hysterectomy                            | 0.435           | 0.1–0.7                        | Triangular   | [18]      |
| Length of hospital stay (days)                                           |                 |                                |              |           |
| Vaginal birth with no PPH                                                | 2.38            | 1.90–2.86                      | Triangular   | [19]      |
| Caesarean section with no PPH                                            | 4.52            | 3.62–5.42                      | Triangular   | [19]      |
| Second-line therapy                                                      | 6               | 3–53                           | Triangular   | [16]      |
| Emergency hysterectomy                                                   | 6.7             | 4.2–9.2                        | Triangular   | [21]      |
| Increment in length of stay associated with PPH                          | 1.264           | 1.133–1.395                    | Triangular   | [20]      |
| <b>Cost inputs (USD)</b>                                                 |                 |                                |              |           |
| PPH prevention (per course)                                              |                 |                                |              |           |
| Oxytocin                                                                 | 1.03–4.10       | -                              | -            | Local     |
| Carbetocin                                                               | 25.6            | -                              | -            | Local     |
| PPH treatment (per course)                                               |                 |                                |              |           |
| Uterotonic agents                                                        | 63              | 2–182                          | Triangular   | Local     |
| Second-line therapy                                                      | 2,765           | 2,247–3,318                    | Triangular   | Local     |
| Emergency hysterectomy                                                   | 11,477          | 10,319–12,634                  | Triangular   | Local     |
| Cost per day                                                             |                 |                                |              |           |
| No PPH                                                                   | 654             | -                              | -            | Local     |
| PPH without hysterectomy                                                 | 654             | 654–1,750                      | Triangular   | Local     |
| PPH with hysterectomy                                                    | 654             | 654–3,128                      | Triangular   | Local     |

PPH: Postpartum haemorrhage; USD1 = HKD7.8; uterotonic agents for PPH treatment included oxytocin, oxytocin with ergometrine, carboprost.

<https://doi.org/10.1371/journal.pone.0279130.t001>

## Disutility inputs

The expected PPH-related QALY loss in each study arm was calculated by the length of hospital stay with a health state and the corresponding disutility. The key PPH-related health states considered for QALY loss estimation were: PPH-related hospitalization without hysterectomy and PPH-related hospitalization with hysterectomy. The disutility values for PPH-related hospitalization with hysterectomy (0.435) and without hysterectomy (0.347) adopted the utility values applied in a cost-effectiveness analysis of PPH management in the US [18]. The length of stay in cases with PPH was estimated by length of stay without PPH in Hong Kong [19] and relative increment of hospital stay with PPH (1.264) versus no PPH [20]. The duration of

hospitalization for cases received second-line therapies and hysterectomy were retrieved from clinical outcome studies in Hong Kong [16, 21]. The QALY loss resulted from hysterectomy-related mortality was approximated by the age-specific health utility [22] and age-specific remaining life expectancy (Hong Kong life tables) [23]. The base-case age (33 years) of women who gave birth was retrieved from the Census and Statistics Department of Hong Kong SAR [24]. The mortality-related QALY loss were discounted to current year with an annual rate of 3%.

### Cost inputs

The cost analysis included direct medical costs of major healthcare resource items: Drug acquisition costs of oxytocin and carbetocin for PPH prevention, uterotonic agents for first-line PPH treatment (oxytocin, oxytocin with ergometrine, carboprost), second-line therapy, emergency hysterectomy, and hospitalization.

The public healthcare services provided by the Hospital Authority (the sole public healthcare provider in Hong Kong) are almost completely subsidized by the government. Non-Hong Kong residents are billed upon the charges of healthcare services posted in the Hong Kong Gazette. Assuming the charges listed in the Gazette represent only the cost components (including manpower costs) with no profits, the cost inputs for hospital-related resources (emergency hysterectomy, uterine sutures, cost per day in general ward, high dependency unit and intensive care unit) were therefore approximated using the charges listed in the Hong Kong Gazette. Emergency hysterectomy was the most costly healthcare resource item (USD11,477). Compression suture of uterine was reported as the most common second-line therapy for massive PPH in Hong Kong [16], and the base-case cost input of the second-line therapy therefore adopted the cost of uterine suture (USD2,765). The cost per hospital day adopted the general ward cost (USD654 per day) as the base-case value, and costs for high dependence unit (USD1,750 per day) and intensive care unit (USD3,128 per day) as the upper limit (in sensitivity analysis) for PPH without and with hysterectomy, respectively. All costs were adjusted to year 2022 with an annual discount rate of 3%.

### Cost-effectiveness analysis and sensitivity analysis

The analysis was performed using TreeAge Pro 2022 (TreeAge Software Inc, Williamstown, MA, USA) and Excel 365 (Microsoft Corporation, Redmond, WA, USA). A PPH prevention option was accepted as cost-effective if it resulted in (1) lower QALY loss at lower cost, or (2) lower QALY loss at higher cost and the incremental cost per QALY saved ( $ICER = \Delta Cost / \Delta QALY \text{ loss}$ ) was less than the willingness-to-pay (WTP) threshold. In the present model, the gross domestic product per capita of Hong Kong (USD49,630; USD1 = HKD7.8) was adopted as the WTP threshold for highly cost-effective health interventions [25, 26].

The range for sensitivity analysis was either the 95% confidence interval (CI) or high/low values of the model input, if available. If both the 95% CI and high/low values were not reported,  $\pm 20\%$  of the base-case value was used to form the range for sensitivity analysis. Deterministic sensitivity analysis was conducted by variation of each model input over the range for sensitivity analysis specified in Table 1. Probabilistic sensitivity analysis was performed using Monte Carlo simulation. The cost and QALY loss of each study group were recalculated 10,000 times by randomly drawing all model input values simultaneously. The details of distributions used in the probabilistic sensitivity analysis are provided in S1 Table. The difference in cost and QALY loss between carbetocin versus oxytocin of the 10,000 simulations were presented in a scatter plot to determine the probability of carbetocin to be cost-effective.

## Results

### Model validation

The occurrence of clinical events simulated by the present model was validated with the incidence of events reported by the public healthcare provider in Hong Kong. The expected PPH  $\geq 500$  mL and emergency hysterectomy in the oxytocin group simulated by the present model were 4.88% and 0.055%, respectively. The model findings were highly similar to the incidence of PPH  $\geq 500$  mL (4.8%-5.2%), and emergency hysterectomy (0.04%-0.07%) in 2013–2016 (prior to the introduction of carbetocin in public hospitals) [6].

### Base-case analysis

The expected PPH-related total direct cost, PPH  $\geq 500$  mL and  $\geq 1,500$  mL, hysterectomy, death, and QALY loss of each study group are shown in Table 2. When compared to the oxytocin group, the carbetocin group reduced PPH-related cost (by USD29 per birth), PPH  $\geq 500$  mL and  $\geq 1,500$  mL (by 13.7 and 1.9 per 1,000 births), hysterectomy (by 0.15 per 1,000 births), maternal death (by 0.02 per 1,000 births), and saved 0.00059 QALY per birth. The carbetocin was therefore the preferred cost-effective option for PPH prevention of child birth from the perspective of public healthcare provider in Hong Kong.

### Sensitivity analysis

In the one-way deterministic sensitivity analysis, the carbetocin group remained to save QALY (comparing to oxytocin) throughout variation of all model inputs (with no threshold value identified). The expected cost-saving generated by the carbetocin group was sensitive to the variation of relative risk of PPH  $\geq 500$  mL with carbetocin versus oxytocin (with a threshold value identified: Total cost of carbetocin group was less than that of the oxytocin group when the relative risk of PPH  $\geq 500$  mL with carbetocin versus oxytocin was  $<0.874$  (base-case value 0.720). A common influential model input on both the cost and QALY loss was proportion of child births by C-section, despite no threshold value identified. A two-way sensitivity analysis was further performed (with extended ranges) on the relative risk of PPH  $\geq 500$  mL with carbetocin and the proportion of child births by C-section. In Fig 2, the white area indicated the combinations of model input values for oxytocin to be cost-effective at the WTP threshold of 49,630 USD/QALY. The grey area indicated the combinations of model input values for carbetocin to be the cost-effective option. At 30% child births by C-section, relative risk of PPH  $\geq 500$  mL with carbetocin (versus oxytocin) needed to be  $<0.919$  for carbetocin to be cost-effective. If the proportion of child births by C-section was 100%, relative risk of PPH  $\geq 500$  mL with carbetocin needed to be  $<0.971$  for the carbetocin group to be cost-effective. When all child births were vaginal delivery (0% C-section), the carbetocin PPH prevention would be accepted as cost-effective with relative risk of PPH  $<0.754$ .

**Table 2. Base-case analysis.**

| PPH Prevention | Total direct cost (USD) (per birth) | PPH $\geq 500$ mL (per 1,000 births) | PPH $\geq 1,500$ mL (per 1,000 births) | Emergency hysterectomy (per 1,000 births) | Death (per 1,000 births) | QALY loss (per birth) |
|----------------|-------------------------------------|--------------------------------------|----------------------------------------|-------------------------------------------|--------------------------|-----------------------|
| Carbetocin     | 161                                 | 35.1                                 | 5.0                                    | 0.40                                      | 0.05                     | 0.00153               |
| Oxytocin       | 190                                 | 48.8                                 | 6.9                                    | 0.55                                      | 0.07                     | 0.00212               |

PPH: Postpartum haemorrhage; USD1 = HKD7.8; QALY: quality-adjusted life-year.

<https://doi.org/10.1371/journal.pone.0279130.t002>

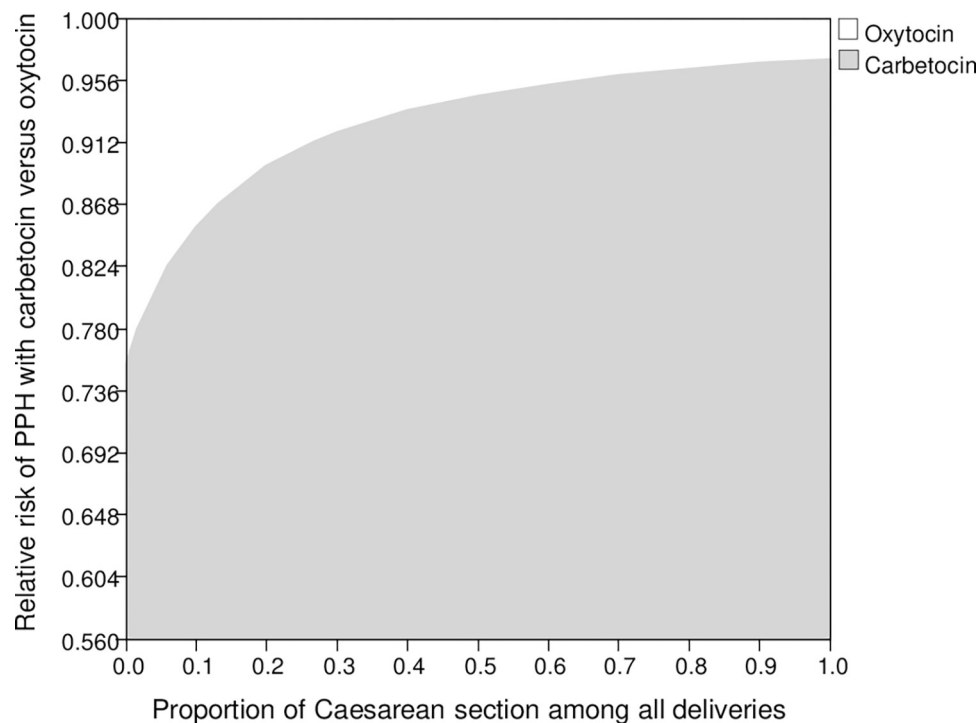

**Fig 2. Two-way sensitivity analysis of relative risk of PPH  $\geq 500$  mL with carbetocin and proportion of child births by Caesarean section on cost-effectiveness of carbetocin.** Threshold line divided the grey zone and white zone; combinations of variables on threshold line had the same cost-effectiveness for carbetocin and oxytocin; white zone: combinations of variables led to oxytocin to be cost-effective; grey zone: combinations of variables led to carbetocin to be cost-effective. PPH: Postpartum haemorrhage.

<https://doi.org/10.1371/journal.pone.0279130.g002>

Probabilistic sensitivity analysis was conducted by Monte Carlo simulation of the cost and QALY loss of both groups for 10,000 times. The incremental cost and QALY saved by the carbetocin group versus the oxytocin group are shown in a scatter plot (Fig 3). When comparing to the oxytocin group, the carbetocin group saved cost by USD75 (95%CI USD74 –USD76;  $p < 0.001$ ) and saved QALY by 0.000590 (95%CI 0.000586–0.000594;  $p < 0.001$ ). The carbetocin

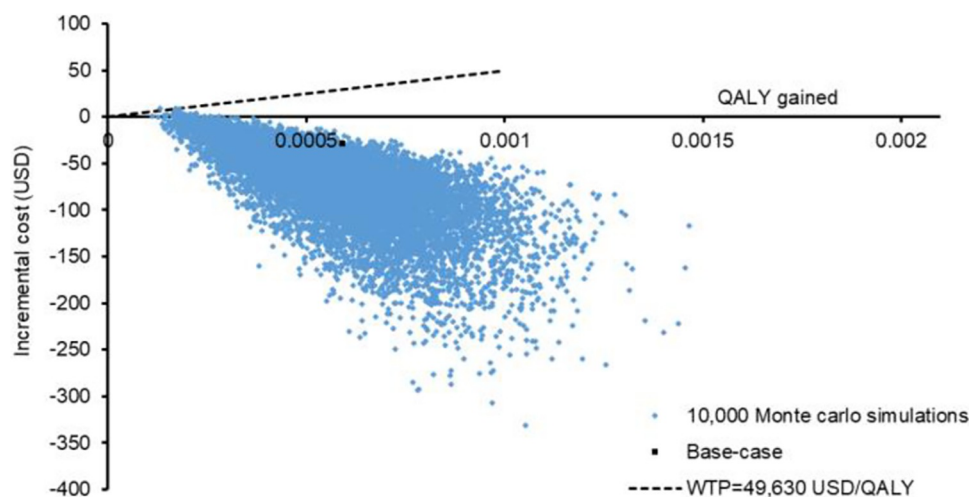

**Fig 3. Scatter plot of the incremental cost against QALY saved by the carbetocin group versus the oxytocin group in 10,000 Monte Carlo simulations.** QALY: quality-adjusted life-year.

<https://doi.org/10.1371/journal.pone.0279130.g003>

group saved cost and QALY in 99.7% and 100% of the 10,000 simulations, respectively, and was accepted as the cost-effective option in >99.7% of time when WTP was lowered to zero USD/QALY.

## Discussion

The present cost-effectiveness analysis examined the outcomes of carbetocin for PPH prevention in women at the third stage of child birth, measured as direct medical cost, PPH, emergency hysterectomy, death and QALY loss in Hong Kong (a low PPH-burden and high-resource city of China). The validity of the model output was demonstrated by the high similarity between the model-simulated and epidemiologic report of the incidence of PPH and emergency hysterectomy. The base-case analysis results found PPH prevention with carbetocin to save QALY (by 0.00059 per patient) and cost (by USD29 per patient) from the perspective of the public healthcare provider in Hong Kong. Despite higher cost per course of PPH prevention with carbetocin versus oxytocin, the total direct medical cost saving and QALY gained by carbetocin were generated from the significant reduction of PPH  $\geq 500$  mL (RR 0.72 (95% CI 0.56 to 0.93)) when compared to oxytocin (as demonstrated by the network meta-analysis) [8]. The averted cases of PPH  $\geq 500$  mL further reduced healthcare resource utilization of first-line/second-line therapies and emergency hysterectomy for PPH treatment. Beside health economic gain, the reduced need for PPH treatment also reduced the patient-time spent in PPH-related health states with health disutility (thus saved QALYs).

The deterministic sensitivity analysis findings showed the base-case cost-effectiveness results of PPH prevention with carbetocin to be highly robust, with threshold value identified for one influential factor (relative risk of PPH  $\geq 500$  mL with carbetocin versus oxytocin). In addition to the effectiveness of carbetocin in preventing PPH, the proportion of child births by C-section was also found to be influential to the variation of both cost and QALY loss in the carbetocin group. As indicated by prior reports, the absolute risk of PPH  $\geq 500$  mL was 5-fold higher in C-section births (comparing to vaginal births) [8], and over 70% of delivery mode was C-section in massive PPH cases [16]. The two-way sensitivity analysis on these two influential parameters (relative risk of PPH  $\geq 500$  mL with carbetocin and proportion of child births by C-section) over extended ranges found that lower proportion of C-section delivery (higher percentage of vaginal births) required a relatively higher risk reduction of PPH  $\geq 500$  mL for carbetocin to be accepted as the cost-effective PPH prevention option. The results of the probabilistic sensitivity analysis further supported carbetocin to be cost-effective in >99.7% of 10,000 Monte Carlo simulations at a WTP of zero USD/QALY.

A systematic review on 15 studies of cost-effectiveness of PPH prevention using uterotonic agents, including 11 studies in low resource settings and three studies in the UK [27]. The three UK studies reported that carbetocin was the preferred cost-effective option for PPH prevention in vaginal births [9, 10] and C-section births [11]. The findings of the systematic review further suggested that the cost-effectiveness findings of uterotonic agents was not generalizable across countries with different resources and health systems [27]. It is therefore important to generate health system and region-specific cost-effectiveness data to inform the decision-maker to optimize the PPH prevention outcomes. The decision-analytic model developed in the present study, including the key clinical, disutility and cost inputs for both vaginal and C-section births, is readily to be adopted in another setting (of different PPH burden and resource level) by using region-specific parameters to inform the model. The model-generated outcomes are also readily to be update with new epidemiology data (when available) to continuously inform the clinicians and healthcare administrators on the optimal use of healthcare resources for PPH prevention.

## Study limitations

There were some limitations in the present cost-effectiveness analysis. Decision-analytical modelling is in general subject to uncertainty of model inputs. The clinical model inputs were extracted from international and local clinical trials. Despite the high transferability of clinical effectiveness findings for cost-effectiveness analyses [28], the clinical inputs sourced from overseas trials might affect the generalizability of model results to patients in Hong Kong. Rigorous sensitivity analyses were therefore performed to examine the impact of model input uncertainty on the robustness of base-case results. A Hong Kong-specific WTP threshold has not yet determined, and a GDP-based WTP threshold was therefore adopted in the present study. We further examined the carbetocin cost-effectiveness over a wide range of WTP threshold, and found carbetocin to save cost and QALY despite the WTP threshold was lowered from 49,630 USD/QALY to zero USD/QALY. The cost analysis included direct medical cost and indirect cost (loss of productivity) was not considered. The model structure was designed over a short timeframe (postpartum hospitalization period), and did not fully take into account the long-term consequence. The long term consequence such as psychological impact associated with serious postpartum events could affect life-long quality of life [29]. The short model time-frame and lack of PPH-associated psychological indexes for QALY assessment might therefore underestimate the economic benefits of PPH prevention with carbetocin.

## Conclusion

PPH prevention with carbetocin at the third stage of child birth (by vaginal or C-section) appeared to save total direct medical cost and QALY from the perspective of public healthcare provider in Hong Kong. The cost-effectiveness acceptance of carbetocin is subject to the risk reduction of PPH associated with carbetocin and the proportion of C-section delivery among all child births.

## Supporting information

**S1 Table. Probabilistic distributions and parameters used in the probabilistic sensitivity analysis.**  
(DOCX)

## Author Contributions

**Conceptualization:** Joyce H. S. You, Tak-yeung Leung.

**Data curation:** Joyce H. S. You, Tak-yeung Leung.

**Formal analysis:** Joyce H. S. You, Tak-yeung Leung.

**Funding acquisition:** Joyce H. S. You.

**Investigation:** Joyce H. S. You.

**Methodology:** Joyce H. S. You.

**Project administration:** Joyce H. S. You.

**Software:** Joyce H. S. You.

**Validation:** Joyce H. S. You, Tak-yeung Leung.

**Writing – original draft:** Joyce H. S. You.

Writing – review & editing: Tak-yeung Leung.

## References

1. Wanderer JP, Leffert LR, Mhyre JM, Kuklina EV, Callaghan WM, Bateman BT. Epidemiology of obstetric-related ICU admissions in Maryland: 1999–2008\*. *Crit Care Med.* 2013; 41:1844–1852. <https://doi.org/10.1097/CCM.0b013e31828a3e24> PMID: 23648568
2. Mhyre JM, Tsen LC, Einav S, Kuklina EV, Leffert LR, Bateman BT. Cardiac arrest during hospitalization for delivery in the United States, 1998–2011. *Anesthesiology.* 2014; 120:810–818. <https://doi.org/10.1097/ALN.000000000000159> PMID: 24694844
3. WHO recommendations for the prevention and treatment of postpartum haemorrhage [https://apps.who.int/iris/bitstream/handle/10665/75411/9789241548502\\_eng.pdf](https://apps.who.int/iris/bitstream/handle/10665/75411/9789241548502_eng.pdf)
4. Reale SC, Easter SR, Xu X, Bateman BT, Farber MK. Trends in Postpartum Hemorrhage in the United States From 2010 to 2014. *Anesth Analg.* 2020; 130(5):e119–e122. <https://doi.org/10.1213/ANE.0000000000004424> PMID: 31567319
5. Ford JB, Patterson JA, Seeho SK, Roberts CL. Trends and outcomes of postpartum haemorrhage, 2003–2011. *BMC Pregnancy Childbirth.* 2015; 15:334. Published 2015 Dec 15. <https://doi.org/10.1186/s12884-015-0788-5> PMID: 26670767
6. Leung WC. Prevention of postpartum haemorrhage. *Hong Kong Med J* 2020; 26:370–1 <https://doi.org/10.12809/hkmj205107> PMID: 33089786
7. Rath W. Prevention of postpartum haemorrhage with the oxytocin analogue carbetocin. *Eur J Obstet Gynecol Reprod Biol.* 2009; 147(1):15–20. <https://doi.org/10.1016/j.ejogrb.2009.06.018> PMID: 19616358
8. Gallos ID, Papadopoulou A, Man R, et al. Uterotonic agents for preventing postpartum haemorrhage: a network meta-analysis. *Cochrane Database Syst Rev.* 2018; 12(12):CD011689. Published 2018 Dec 19. <https://doi.org/10.1002/14651858.CD011689.pub3> PMID: 30569545
9. Pickering K, Gallos ID, Williams H, et al. Uterotonic Drugs for the Prevention of Postpartum Haemorrhage: A Cost-Effectiveness Analysis. *Pharmacoecon Open.* 2019; 3(2):163–176. <https://doi.org/10.1007/s41669-018-0108-x> PMID: 30506157
10. Matthijsse S, Andersson FL, Gargano M, Yip Sonderegger YL. Cost-effectiveness analysis of carbetocin versus oxytocin for the prevention of postpartum hemorrhage following vaginal birth in the United Kingdom. *J Med Econ.* 2022; 25(1):129–137. <https://doi.org/10.1080/13696998.2022.2027669> PMID: 35007465
11. van der Nelson HA, Draycott T, Siassakos D, Yau CWH, Hatswell AJ. Carbetocin versus oxytocin for prevention of post-partum haemorrhage at caesarean section in the United Kingdom: An economic impact analysis. *Eur J Obstet Gynecol Reprod Biol.* 2017; 210:286–291. <https://doi.org/10.1016/j.ejogrb.2017.01.004> PMID: 28088109
12. Hospital Authority. Clusters, Hospitals & Institutions. [https://www.ha.org.hk/visitor/ha\\_visitor\\_index.asp?Content\\_ID=10036&Lang=ENG&Dimension=100&Parent\\_ID=10004](https://www.ha.org.hk/visitor/ha_visitor_index.asp?Content_ID=10036&Lang=ENG&Dimension=100&Parent_ID=10004)
13. Mavrides E, Allard S, Chandrachan E, Collins P, Green L, Hunt BJ, et al., on behalf of the Royal College of Obstetricians and Gynaecologists. Prevention and management of postpartum haemorrhage. *BJOG* 2016; 124:e106–e149.
14. Shek NW. Clinical practice of caesarean section revisited: present and future. *Hong Kong Med J.* 2017; 23(4):324–325. <https://doi.org/10.12809/hkmj175068> PMID: 28775220
15. Tse KY, Yu FNY, Leung KY. Comparison of carbetocin and oxytocin infusions in reducing the requirement for additional uterotonics or procedures in women at increased risk of postpartum haemorrhage after Caesarean section. *Hong Kong Med J.* 2020; 26(5):382–389. <https://doi.org/10.12809/hkmj208683> PMID: 33028723
16. Chan LL, Lo TK, Lau WL, et al. Use of second-line therapies for management of massive primary postpartum hemorrhage. *Int J Gynaecol Obstet.* 2013; 122(3):238–243. <https://doi.org/10.1016/j.ijgo.2013.03.027> PMID: 23806248
17. Ueda A, Nakakita B, Chigusa Y, et al. Impact of efforts to prevent maternal deaths due to obstetric hemorrhage on trends in epidemiology and management of severe postpartum hemorrhage in Japan: a nationwide retrospective study. *BMC Pregnancy Childbirth.* 2022; 22(1):496. Published 2022 Jun 17. <https://doi.org/10.1186/s12884-022-04824-7> PMID: 35715763
18. Sudhof LS, Shaiker SA, Einerson BD. Tranexamic acid in the routine treatment of postpartum hemorrhage in the United States: a cost-effectiveness analysis. *Am J Obstet Gynecol.* 2019; 221(3):275.e1–275.e12. <https://doi.org/10.1016/j.ajog.2019.06.030> PMID: 31226298

19. Lee CYC, Ip WY. The Efficacy of Breastfeeding in Chinese Women with Different Intrapartum Experiences: a Hong Kong Study. *HKJGOM* 2008; 8(1):13–17.
20. Marshall AL, Durani U, Bartley A, et al. The impact of postpartum hemorrhage on hospital length of stay and inpatient mortality: a National Inpatient Sample-based analysis. *Am J Obstet Gynecol*. 2017; 217(3):344.e1–344.e6. <https://doi.org/10.1016/j.ajog.2017.05.004> PMID: 28502758
21. Leung PL, Tsang SW, Yuen PM; Quality Assurance Subcommittee in Obstetrics and Gynaecology, Hospital Authority, Hong Kong. An audit on hysterectomy for benign diseases in public hospitals in Hong Kong. *Hong Kong Med J*. 2007; 13(3):187–193. PMID: 17548906
22. Gold MR, Franks P, McCoy KI, Fryback DG. Toward consistency in cost-utility analyses—Using national measures to create condition-specific values. *Medical Care*. 1998; 36(6):778–92. <https://doi.org/10.1097/00005650-199806000-00002> PMID: 9630120
23. Census and Statistics Department, The Government of the Hong Kong SAR. Hong Kong Life Tables 2014–2069. (website)
24. Census and Statistics Department, The Government of the Hong Kong SAR. Women and Men in Hong Kong—Key Statistics (2022 edition) <https://www.censtatd.gov.hk/en/EIndexbySubject.html?pcode=B1130303&scode=180>
25. Census and Statistics Department, The Government of the Hong Kong SAR. National Accounts. [https://www.censtatd.gov.hk/en/web\\_table.html?id=31](https://www.censtatd.gov.hk/en/web_table.html?id=31)
26. World Health Organization. The World health report 2002: Reducing risks, promoting healthy life. Geneva: The Organization; 2002.
27. Lawrie TA, Rogozińska E, Sobiesuo P, Vogel JP, Ternent L, Oladapo OT. A systematic review of the cost-effectiveness of uterotonic agents for the prevention of postpartum hemorrhage. *Int J Gynaecol Obstet*. 2019; 146(1):56–64. <https://doi.org/10.1002/ijgo.12836> PMID: 31049950
28. Barbieri M, Drummond M, Rutten F, et al. What do international pharmacoeconomic guidelines say about economic data transferability?. *Value Health*. 2010; 13(8):1028–1037. <https://doi.org/10.1111/j.1524-4733.2010.00771.x> PMID: 20667054
29. Sentilhes L, Gromez A, Clavier E, Resch B, Descamps P, Marpeau L. Long-term psychological impact of severe postpartum hemorrhage. *Acta Obstet Gynecol Scand*. 2011; 90(6):615–20. <https://doi.org/10.1111/j.1600-0412.2011.01119.x> PMID: 21370999
